# Supplementary material
Source: Springer Nature journal article supplement (https://www.springermedizin.de/resource/supplementary/13012_2011_405_MOESM2_ESM.pdf/9629960)
Supplement: MOESM2 [file 9629960]

context

Step 1

- Agree what is to be accomplished with stakeholders

Step 2

- Determine how the impact of change will be measured

Step 3

- Identify what changes should be made

Step 4

- Implement change on a small scale using the PDSA approach

Step 5

- Spread and sustain the changes

facilitation

evidence
